# 1 **Compaction of *Drosophila* histoblasts in a crowded** 2 **epidermis is driven by buckling of their apical** 3 **junctions.**

4 **Annafrancesca Rigato<sup>1,2\*</sup>, Huicheng Meng<sup>1</sup>, Faris Abouakil<sup>1</sup>, and Loïc LeGoff<sup>1\*</sup>**

5 <sup>1</sup>Aix Marseille Univ, CNRS, Centrale Marseille, Institut Fresnel, Turing Center for Living Systems, Marseille, France

6 <sup>2</sup>Aix Marseille Université, CNRS, IBDM, UMR 7288, Marseille, France

7 \*correspondance: [rigato@fresnel.fr](mailto:rigato@fresnel.fr), [loic.le-goff@univ-amu.fr](mailto:loic.le-goff@univ-amu.fr)

## 8 **ABSTRACT**

In many proliferating epithelia, cells present a polygonal shape that results from tensile forces of the cytoskeletal cortex and from the packing geometry set by the cell cycle<sup>1,2</sup>. In the larval *Drosophila* epidermis, two cell populations, histoblasts and larval epithelial cells, compete for space as they grow on a limited body surface. They do so in the absence of cell divisions. Here we show that histoblasts, which are initially polygonal, undergo a dramatic morphological transition in the course of larval development. Histoblasts change from a tensed network configuration, with straight cell outlines at the level of adherens junctions, to a highly folded morphology. The apical surface of histoblasts shrinks while their growing adherens junctions fold. Volume increase of growing histoblasts is accommodated basally, compensating for the shrinking apical area. The folded geometry of apical junctions is reminiscent of elastic buckling. In accordance, we show that folding of junctions results from an imbalance between the growth of the junctions and the increasing crowding of the epidermis. The process also correlates with a change in the junctional acto-myosin cortex and possibly mechanical properties.

We propose a model in which crowding of the epidermis imposes a compressive load on the growing junctions which induces their buckling. Buckling effectively compacts histoblasts at their apical plane and may serve to avoid physical harm to these adult epidermis precursors during larval life. Our work also indicates that in growing non-dividing cells, compressive forces, instead of tension, may drive cell morphology.

## 10 **Introduction**

11 Morphogenesis proceeds through the mechanical interaction of cells in order to shape tissues. Our understanding of the cellular and subcellular processes that generate physical forces instructive for development has considerably improved in recent years<sup>3-6</sup>. At the single cell scale, the role of the cytoskeleton and of adhesion complexes in setting morphological changes has been well established<sup>4,7,8</sup>. As adhesion links cells to their environment, be it other cells or the extracellular matrix, the shape of a cell is determined both by its internally generated active forces and by environmental constraints<sup>9</sup>. Growth can act as a potent environmental constraint to shape cells and tissues. Spatial variations in the orientation or the rate of growth, sometimes called incompatible growth<sup>10,11</sup> lead to mechanical pre-stress impinging upon cells. For example, if one or a patch of cells grows more than its surroundings, the overgrowing patch will be compressed and the surroundings will be stretched<sup>6</sup>.

19 Because of their biological relevance and ease of imaging, epithelial tissues have been particularly well characterized in terms of mechanics. The combination of modeling, analysis of cell shape and mechanical perturbations has led to the following understanding of epithelial mechanics: I) the tissue is in a tensed state; II) cell growth is usually balanced over the cell cycle (cells double in volume from beginning to end of the cell cycle); III) stress can be released through topological transitions such as cell neighbor exchange and oriented cell divisions<sup>12</sup>. With these elements, models were developed for epithelial tissues, able to capture many features of morphogenesis<sup>2,13</sup>. Epithelial monolayers are then described as tensed networks, formed by polygonal-shaped cells with straight borders<sup>14,15</sup>. Nevertheless, tensed epithelia that respect the characteristics above are only a small portion of the complex scenario of morphogenesis. Most of the time, a homogeneous population is considered, constituted of a single cell type.

28 Other than tensile forces, compressive forces are also important shape generators. For example, an elastic body under compressive forces can go through buckling instability<sup>16</sup>, a process at play in gut vilification<sup>17</sup> or in the formation of brain cortical folds by differential growth of apposed cortical cell layers<sup>18</sup>. While these examples are taken from phenomena at large scale, in this work we find evidences that similar effects exist at the level of individual cells.

32 The epidermis of the *Drosophila* larva consists of two cell populations: the larval epithelial cells (LECs), which are

33 large polyploid cells and the histoblasts, which are the precursors of the adult epidermis. These two cell populations form a  
34 continuous cell monolayer<sup>19</sup>. Histoblasts are clustered in nests of a fixed cell number ( 5 to 17 cells per nest) surrounded by  
35 LECs. Growth of both histoblasts and LECs happens without cell division over a large time span of larval development, from 4  
36 hours after hatching until the pupal stage<sup>19,20</sup>. Histoblasts do not exchange neighbors during this period. The growth rates of  
37 histoblasts and LECs are different, with LECs increasing in volume about 150-fold during larval life, and histoblasts 60-fold<sup>19</sup>.  
38 The larval body stops growing around 90 hours after egg laying (h AEL)<sup>19,21</sup> while the epidermal cells continue to grow.  
39 Thus, this binary cellular system, where two cell populations grow and compete for space in the absence of stress-releasing  
40 topological transitions is likely to present a mechanical regime yet unexplored by other epithelial model systems.

41 Here, we investigate the shape of developing histoblasts. We developed a protocol for time-lapse imaging of individual cells  
42 throughout larval stages. We observed that histoblasts go through a considerable morphological transition between 90 h and  
43 110 h AEL, changing from a tensed network configuration with straight cell outlines to a highly folded morphology of cell  
44 shapes, suggestive of compressive forces. We show that the formation of folded junctions is linked to the competition for space  
45 of LECs and histoblasts in a non-autonomous fashion, and is helped by a change in mechanical properties of the junctions. We  
46 propose a model according to which crowding of the epidermis imposes a compressive load on the growing junctions which  
47 induces their buckling.

## 48 Results

### 49 Histoblasts undergo a dramatic morphological change during the L3 stage

50 To investigate the growth and morphology of histoblasts during the last larval phase, we optimized a protocol for live imaging of  
51 the larval epidermis (see methods and Fig. S1). Briefly, larvae were anesthetized with Desflurane to prevent muscle contractions  
52 and oriented to image the histoblasts. After imaging, larvae were put back in soft medium, necessary for normal growth, at  
53 25°C. Recovery from anesthesia takes few minutes, and larvae can then develop normally. By repeating such procedure every  
54 few hours, we could image the same cells over several hours, without affecting larval development.

55 In each abdominal segment (one to seven) are found two ventrals, two spiraculars and four dorsal (two anterior and two  
56 posterior) histoblast nests. We imaged the dorsal posterior nest, which has the largest number of cells (15-17). We first imaged  
57 the adherens region, which plays an important role in epithelial morphogenesis<sup>22,23</sup>, with the fluorescent protein fusions  
58 E-cadherin:GFP or E-cadherin:mKate. We observed that histoblasts have straight cell borders and a polygonal shape up to  
59 about 90 hours after egg laying (90 h AEL). This morphology is the most commonly found in epithelia. In Fig. 1A-D we  
60 show adherens junctions of the same histoblast nest at different times between 90 and 115 hours AEL. After 90 h AEL, some  
61 cell junctions present local deformations (Fig. 1B), which become more prominent in the following hours (Fig. 1C). At the  
62 wandering stage, about 110 h AEL, the small wrinkles have become deep folds, with shapes that suggest mechanical buckling  
63 (Fig. 1D). These folds persist up to pupariation, when histoblasts initiate a series of fast cell cycle under the influence of  
64 accumulated cyclin E<sup>24</sup>. The emergence of the folds is well encapsulated by a quantification of cell circularity, which is the  
65 normalized ratio between the cell area and its perimeter (Fig. 1E). The circularity of a perfect circle is 1, and it decreases as  
66 the overall shape is less round. Thus, cell circularity decreases as junctions fold. Fluctuating wrinkles of the adherens belt  
67 driven by the tension of the acto-myosin cortex often arise in different developmental contexts<sup>25</sup>. The typical lifetime of these  
68 fluctuations is of the order of minutes. By contrast, the folds we observe in the histoblasts are not dynamic, transient structures.  
69 The folds apparent in Fig. 1A-D evolve from wrinkles to fully developed lobes over a 20 h time window. No fluctuations of  
70 the cell junctions are observed in a period of minutes. Thus, with respect to the typical time scale of cytoskeletal fluctuations  
71 (seconds to minutes), junctional folds can be considered as quasi-static structures.

72 In addition to the circularity, we characterized histoblast shape transition through the quantification of their perimeter (Fig.  
73 1F) and cell area (Fig. 1G). Interestingly, the cell perimeter slowly increases from 60 to 70  $\mu\text{m}$  between 90 and 100 h AEL,  
74 while it grows quickly up to 100  $\mu\text{m}$  after 100 h AEL. On the contrary, we observe a slow decrease of cell area between 90 and  
75 100 h AEL, and faster decrease from 200  $\mu\text{m}^2$  at 100 h AEL to 120  $\mu\text{m}^2$  after 100 h AEL until the pupal stage. A decreasing  
76 area but an increasing perimeter results into a dramatic decrease of cell circularity, from 0.8 before the formation of folds, to  
77 0.2 when the folds are fully formed.

78 To our knowledge, the only available data about epidermal growth in this system was obtained by electron microscopy and  
79 estimated from two dimensional data by<sup>19</sup>, who reported a 150-fold increase in volume of LECs and 60-fold of histoblasts.  
80 While an increasing perimeter at the adherens plane seems compatible with growth of cells, we were surprised to observe a  
81 decrease in apical area. Hence, we investigated histoblasts growth in three dimensions, from the beginning of folds formation to  
82 the wandering stage (Fig. 2).

### 83 As their apical surface shrinks, histoblasts grow basally

84 We analyzed the 3D-shape of histoblasts in the course of the morphological transition by imaging their basolateral membrane  
85 with a src:GFP fusion and adherens junctions with an E-cad:mKate fusion (Fig. 2). Before the folds appear, cell borders have

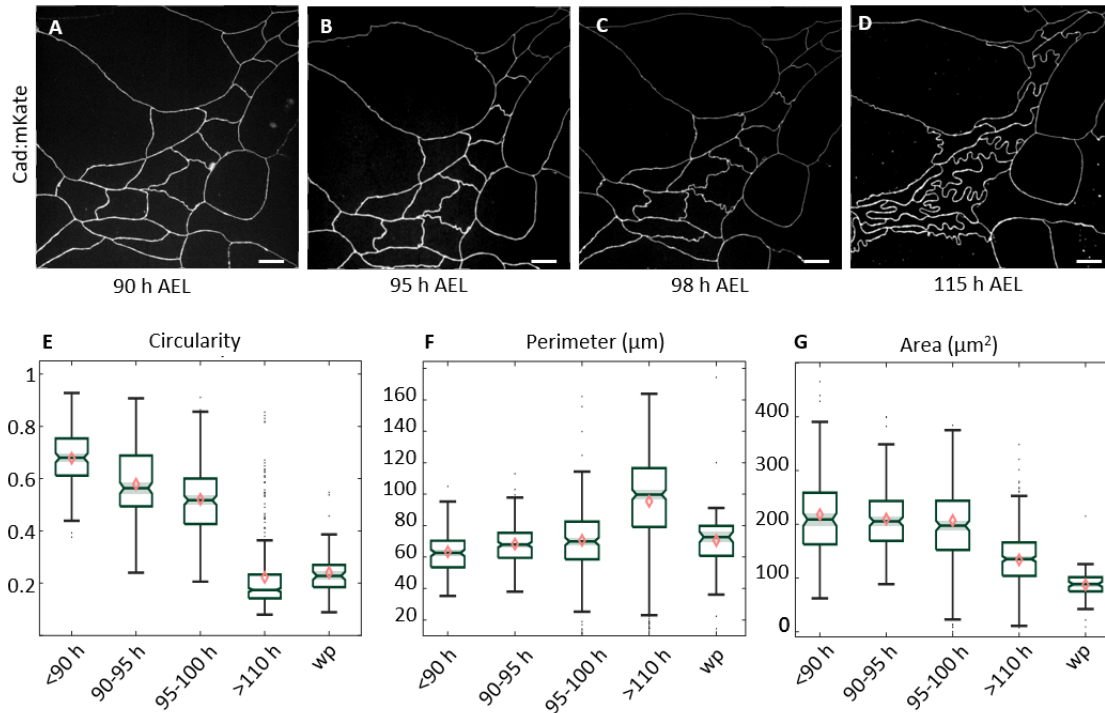

**Figure 1. Remodeling of histoblasts' junction during epidermal morphogenesis.** A-D: Chronic imaging of cadherin junctions at different times after egg laying (AEL). While at the beginning of the 3rd instar cell junctions are still straight, and develop more folds as the larvae grows, reaching a maximum before the pupariation, i.e. at the wandering stage. E-G: Quantification of morphological parameters of histoblasts. Cell circularity (E) quantifies the shape change due to the formation of folds, with values ranging from 0 to 1. A value of one corresponds to a perfect circle. Cell perimeter is growing as the larva grows (F), while cell area decreases (G). Scale bar = 10  $\mu\text{m}$ . For each time interval, the number of analyzed cells is  $N = 187$ ,  $N = 225$ ,  $N = 186$ ,  $N = 352$ ,  $N = 74$ .

86 the same straight shape at the adherens and basal planes, as can be seen in Fig. 2A-C. From the orthogonal projections in Fig.  
87 2C (ZX and ZY) the apical and basal surface appear close to each other, with a total cell thickness of about 6  $\mu\text{m}$ , which is  
88 comparable to the thickness of the LECs<sup>26</sup>. As junctions fold (Fig. 2D-F), the shape of histoblasts at the basal side assumes a  
89 different morphology than at the apical side. In particular, as shown in Fig. 2D, the nest is much larger basally than apically,  
90 and no junctional folding is visible basally. On the contrary, the basal side of histoblasts assumes a rounded, bulb-like shape.  
91 The difference in morphology of the apical and basal sides are striking on the overlay of the basal and apical membrane signal  
92 of Fig. 2G,H. Additionally, cell thickness is greatly increased in the course of the transition, with the apical and basal plane  
93 now being well separated, as shown from the orthogonal projections in Fig. 2F. The increase of cell thickness correlates well  
94 with the appearance of the folded phenotype, as demonstrated by plotting the distance between the basal and apical plane for  
95 different cell circularities (Fig. 2G). As reported in Fig. 2G, the average cell thickness increases from about 6  $\mu\text{m}$  to 10  $\mu\text{m}$  in  
96 the course of the morphological transition. As the apical area decreases while the height increases, we segmented histoblast  
97 nests after expression of a cytosolic GFP with a histoblast driver (*esg-Gal4*) to estimate their volume in the course of the  
98 transition. Because the cell number is constant in the histoblasts at this stage, the measurement gives us the cell-volume increase  
99 averaged over the nest. The measurements were done on individual nests, tracked over time through chronic imaging at three  
100 different time points. As reported in Fig. S2, cell volume increases 2-folds between 90 and 115 h AEL. Hence, histoblasts do  
101 grow during the last larval stage.

102 As shown in Fig. 2C, histoblasts are round-shaped at the basal side. Hence, the folded phenotype observed at the level  
103 of cadherin junctions is lost. To investigate whether the folds are only localized at the apical plane and lost immediately  
104 below, or whether they are gradually lost, we imaged septate junctions with a disc large protein fusion (*dlg:GFP*) together with  
105 E-cadherins (*cad:mKate*). Septate junctions are localized just below adherens junctions. Before junctional folds are formed,  
106 septate junctions have the same shape as adherens junctions. Their projections superpose (Fig. 2I). When folds appear, septate  
107 junctions follow only partially the shape of adherens junctions despite being localised very close to them (Fig. 2J). Thus cell  
108 border at the level of septate junctions are less folded than at the level of the adherens junctions but more than at the basal level.

109 In summary, over the time window from 90 h to 110 h after egg laying, histoblasts increase their volume two fold while their  
110 adherens junctional material also increase by a factor of 1.7. However, in that same time window, their apical area decreases.  
111 The volume increase is redistributed at the basal side of cells. We thus formulated a working hypothesis summarized in Fig. 2H,  
112 according to which junctional folding in histoblasts would be generated by the competition for space of the two cell populations  
113 - histoblasts and larval epithelial cells- on a limited surface on the larval body. In this framework, compressive forces build up  
114 as the two cell populations grow on a limited surface. At some point, the growth of histoblasts does not proceed freely. The  
115 lateral constraints leads to shrinking of the apical surface of histoblasts, mechanical buckling of the growing junctions there,  
116 and volume redistribution at the basal side. The overcrowding effect could be enhanced by the slowing down of larval body  
117 growth after 90 h AEL<sup>21</sup> The junctions of histoblasts buckle, but those of LECs remain mostly straight. We explored whether  
118 some changes occur in the cytoskeleton of histoblasts that could affect the cortex in the adherens plane. Indeed, the critical load  
119 beyond which buckling proceeds depends in general on the stiffness of the compressed structure. The morphological transition  
120 could thus occur through a change in junctional stiffness.

## 121 **Junctional buckling is accompanied by a partial depletion of the cell cytoskeleton from the apical junctions**

122 The acto-myosin network plays a prominent role in setting the mechanical state of apical junctions<sup>22,23,27</sup>. Hence, we assessed  
123 the rearrangement of the acto-myosin network in the course of the folding transition. To do this, we first imaged flies carrying  
124 both *cad:mKate* and an affimer-GFP fusion to image actin (*af:GFP*,<sup>28</sup>, see methods) before and after the transition (Fig. 3).  
125 Actin colocalizes with cadherin both when junctions are straight (Fig. 3A,B) and after junctions have buckled (Fig. 3D,E).  
126 Nevertheless, after junctional folds have appeared, the actin signal is less neat, and a higher signal intensity is observed coming  
127 from the cell cytosol, at the apical plane (Fig. 3E). Additionally, both in 90 h and in 110 h larvae actin is also present at  
128 the basal side of the histoblasts (Fig. 3C,F) where the junctions are smooth and cells bulb-shaped as previously observed in  
129 *src:GFP* images (Fig. 2). Interestingly, from the orthogonal projections reported in Fig. 3C, F actin is visible at cell vertical  
130 junctions, connecting the apical and basal plane. This suggests that an actin relocation occurs reducing junctional actin and  
131 enriching basolateral junctions in the course of volume redistribution and cell-thickness increase. We quantified actin content  
132 at junctions by measuring the ratio between the junctional and cytosolic intensities of actin:GFP, at the same plane and for  
133 different circularity values (i.e. at different levels of junctional folding). The results of such quantification are reported in Fig.  
134 3G. Details about the analysis and data treatment are given in the methods section and in Fig. S4. The quantification shows that  
135 junctional enrichment decreases with circularity, meaning that less actin is present at junctions when folds are forming.

136 We then imaged Myosin II through a GFP fusion of its regulatory light chain (*Drosophila* spaghetti squash, *sqh:GFP*)  
137 together with *cad:mKate*. As can be seen in Fig. 4, MyoII localizes at histoblasts junctions before the transition (Fig. 4A,B), but it  
138 is almost not visible anymore after buckled junctions have formed (Fig. 4C,D). Compared to E-cadherin (Fig. 4C), the Myosin  
139 II signal is more diffuse (Fig. 4D), and no enrichment at junctions is observed. In contrast to actin, no Myosin II is observed in

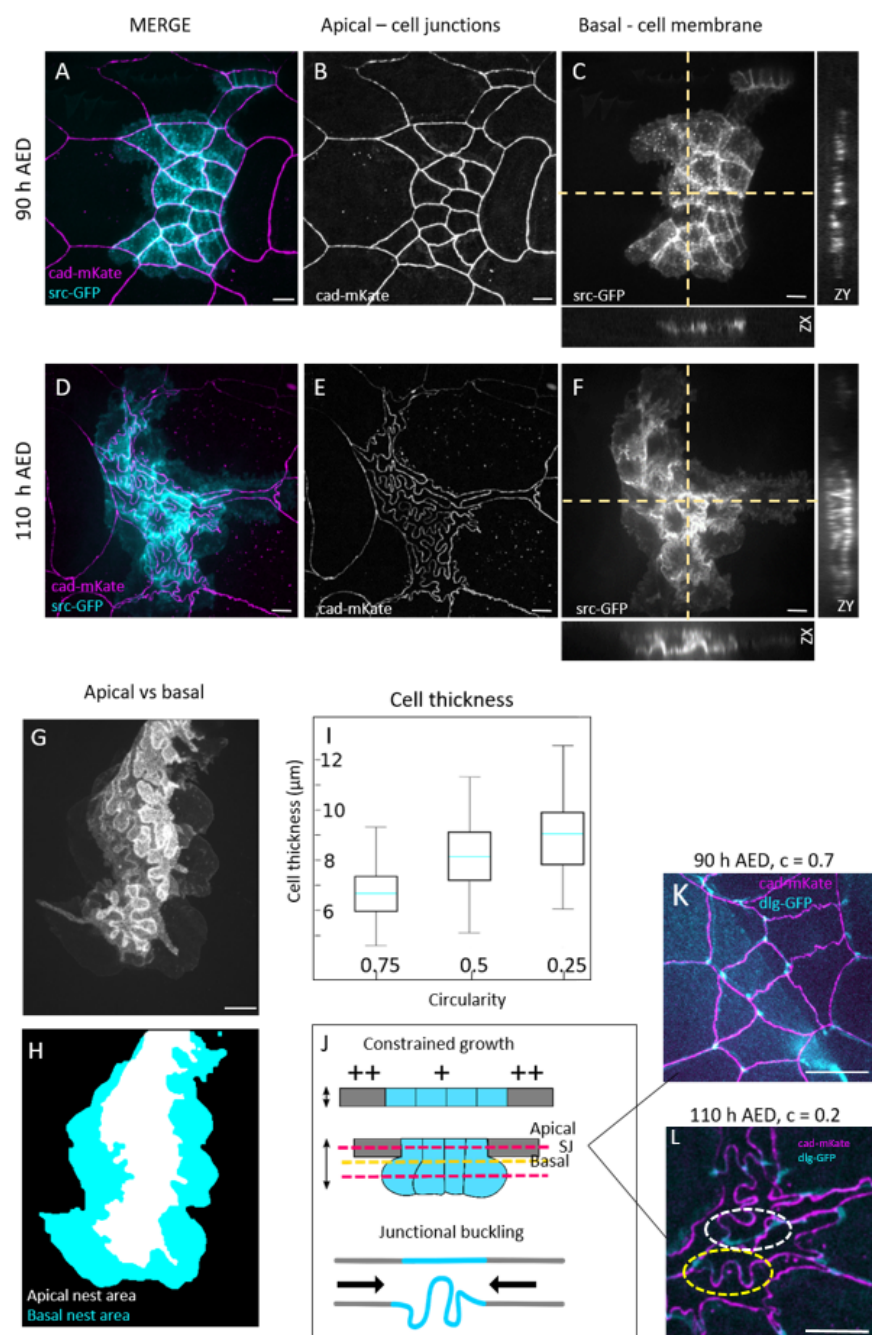

**Figure 2. 3D characterization of histoblast growth and junctional buckling** **A-F:** Live imaging of cadherin junctions (E-cad::mKate) and cell membrane (src::GFP) before (A-C) and after (D-F) apical junction remodeling. **G,H:** superposed projections of the apical and basal plane of a histoblast nest at 110 h AEL. While the apical side presents junctional folds, the basal side is characterized by large and bulb-shaped cells. **I:** Cell thickness plot as a function of cell circularity. Light blue line represent the means, error bars the standard deviation. **J:** Schematics of cell growth below the apical surface as junction remodeling occurs. At the top, section of histoblast and LECs showing how histoblast develop below the epithelial surface. Red dashed lines represent the apical and largest basal plane corresponding to images A-F. The yellow dashed line represents the plane of septate junctions, corresponding to images K and L. **K,L:** Merged projection of apical junctions and septate junctions at 90 h AEL (K), and 110 h AEL (L). Before junctional buckling, apical and septate junctions have similar, superimposing structures. When apical junctions fold, the deformation is partially lost at the plane of septate junctions. White dashed circle: example of straight septate junction. Yellow dashed circle: example of septate junction not following the corresponding apical junction. Scale bar = 10 μm.

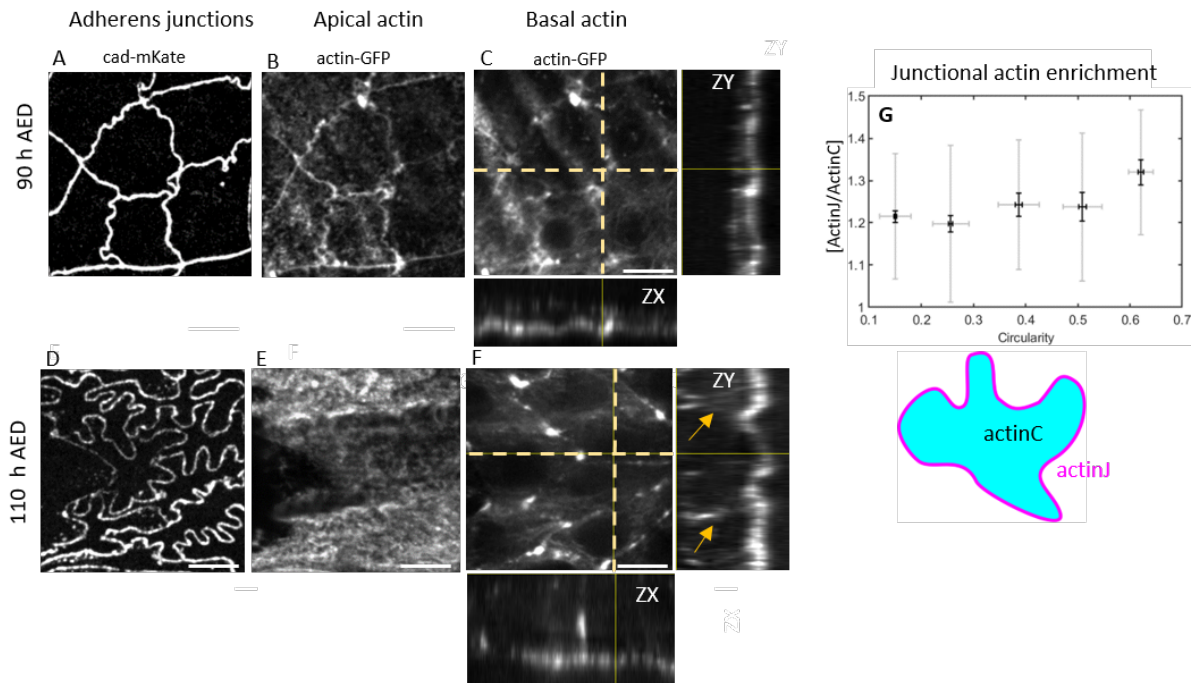

**Figure 3. Localization of actin in histoblasts before and after apical junction remodeling.** A-F: Live imaging of cadherin junctions and actin at 90 h AEL (A-C) and 110 h AEL (D-F). A,B: Projections of cadherin junctions and corresponding apical actin at 90 h and D, E: at 110 h AEL. C,F: Basal actin and orthogonal views at 90 and 110 h AEL, respectively, showing the xz and yz planes corresponding to the yellow dashed lines. The arrows in the zy plane show the actin structures joining the apical and basal planes. Scale bar = 10  $\mu$ m. G: Plot of relative amount of junctional actin as a function of circularity, calculated as the ratio junctional signal/cytosolic signal at the same plane. The plot represents actin enrichment for each circularity bin as mean value  $\pm$  SD (gray) and SEM (black). actinJ = junctional actin, actinC = cortical actin, as represented in the schematic. A total of 23 histoblast nests with about 15 cells/nest were analyzed. The data were pooled and binned according to the circularity value.

140 the basal side of cells, where only a weak diffuse signal was visible (not shown). As previously done for actin enrichment, we  
 141 quantified Myosin II content at apical junctions as a function of cell circularity. As shown in Fig 4E, as junctions fold (i.e. as  
 142 circularity decreases), Myosin II junctional enrichment decreases. Thus, junctional folding is accompanied by a gradual loss of  
 143 Myosin II from cell junctions. The observed loss in Myosin II from junctions is likely to change the mechanical properties of  
 144 histoblasts, possibly representing a reduction in stiffness which would facilitate buckling.

145 We could not identify the pathway that leads to Myosin-II depletion from junctions. In particular, the upstream regulator  
 146 Rok does not seem to be implicated as no significant effect was observed on junction morphology when Rok activity was  
 147 depleted (*esgGal4>RokRNAi*) or increased (*esgGal4>RokCAT*) in histoblasts, as reported in Fig. S3. Rok alterations in LECs  
 148 (*eip71>RokRNAi*) did have a non autonomous effect on histoblast. Histoblasts still presented buckled junctions, but their  
 149 overall shape appears less squeezed in the horizontal direction (Fig. S3D). Although sample variability was very high and the  
 150 statistical analysis did not highlight any significant variation in Fig. S3D, the non-autonomous effect on histoblasts is in line  
 151 with a mechanical tug of war between the two cell populations in the epidermis.

152 Overall, our data thus indicate that the change in mechanical properties of adherens junctions is linked with a change in  
 153 the organization of the apical cytoskeleton of cells. Furthermore, the volume redistribution to the basal side is not an entirely  
 154 passive mechanism as it is accompanied by the formation of vertical actin structures at the tri-cellular cell interfaces.

### 155 The larval epidermis is not a tensed epithelium

156 Our working hypothesis is that junctional folds are the results of lateral compression on the junctions of histoblasts. This implies  
 157 that folding is not a tension-driven morphology. Additionally, we observe a loss of junctional myosin (Fig. 4), which also  
 158 suggests a lack of tension in the tissue. To test this, we ablated both LECs and histoblast junctions during the morphological  
 159 transition (around 95 h AEL). We performed laser ablation on *cad:GFP* with a custom-built setup (see Material and Methods).  
 160 First, we tested our system on a control, tensed epithelium - the adult epidermis after complete replacement of LECs by

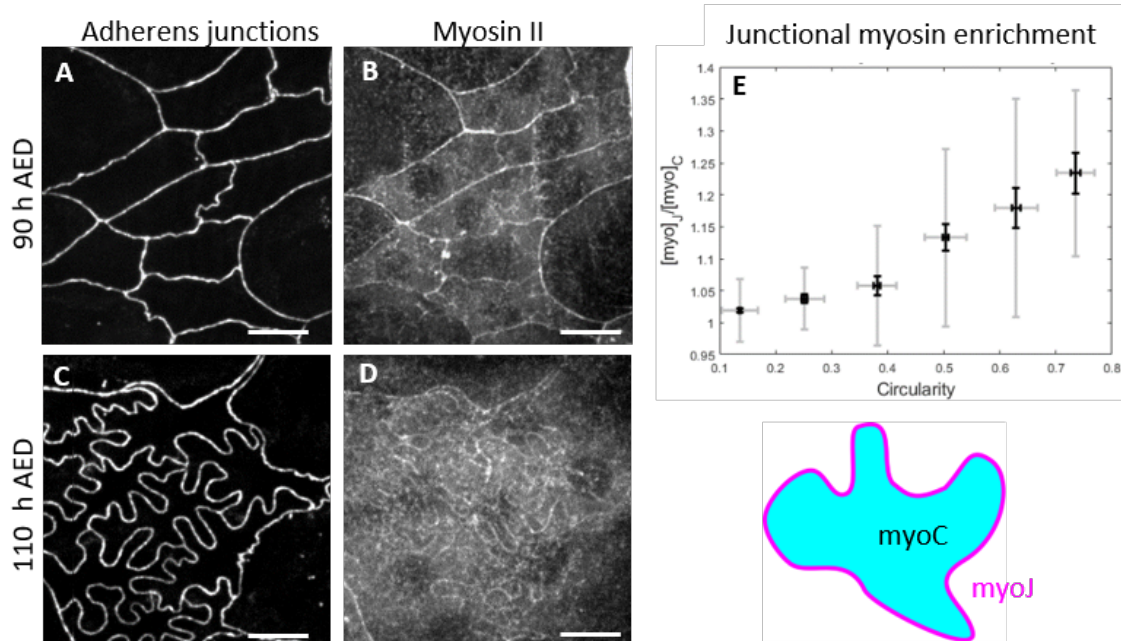

**Figure 4. Localization of Myosin II in histoblasts before and after apical junction remodeling.** Live imaging of cadherin junctions and corresponding apical myosin II at 90 h AEL (A,B) and 110 h AEL (C,D). Scale bar = 10  $\mu$ m. E Plot of relative amount of junctional myosin as a function of circularity, calculated as the ratio junctional signal/cytosolic signal at the same plane. The black and gray plot represents actin enrichment for each circularity bin as mean  $\pm$  SD (gray) and SEM (black). MyoJ = junctional myosin, MyoC = cortical myosin, as represented in the schematic. A total of 29 histoblast nests with about 15 cells/nest were analyzed, and the data pooled and binned according to circularity values.

161 histoblasts in the pupal stage. When the adult epidermis was ablated, relaxation of the cut junctions was observed, as well as  
 162 a shape change in the neighboring cells (Fig. 5A). Similar relaxations were observed in the wing imaginal discs, another tissue  
 163 known to be under tension<sup>2,29-31</sup>. Instead, when either LECs or histoblasts were ablated at the larval stage, no relaxation was  
 164 observed (Fig. 5 B,C). When we ablated histoblast junctions at the extremity of a lobe, no effect was observed (Fig. 5B and  
 165 movie SM1). When LECs are ablated close to histoblast nest, no fast relaxation is observed in the course the first 80 seconds.  
 166 A slow relaxation is observed over a few minutes, and no further relaxation during the next 30 min (Fig. 5B, movie SM1).  
 167 After about 1 h, the wound produced by laser ablation is repaired (Fig. 5 C movie S2). These results confirm that epidermal  
 168 morphology and homeostasis in 3rd instar larvae is not driven by a tension-based mechanism. These observations also demand  
 169 a refinement of the buckling hypothesis. In fact, if the morphology of the junction were solely driven by buckling of an elastic  
 170 body (the junction) under compressive forces, we should observe a straightening of the junctions upon ablation. Since this did  
 171 not occur, our data suggest that some plastic remodeling must occur to stabilized buckled junctions and reduce the buildup of  
 172 compressive forces.

### 173 **Junctional buckling in histoblasts is linked to cellular crowding of the epidermis**

174 In our hypothesis, as the two populations grow and compete for space on a limited surface, a lateral pressure builds up and  
 175 constrains growth of histoblasts apically. We used genetic tools to validate the hypothesis that growth plays an essential role in  
 176 junctional buckling. We impaired the insulin pathway specifically in LECs through the over-expression of a dominant-negative  
 177 form of the *Drosophila* insulin receptor (dInR-DN)<sup>26,32</sup>. This resulted in a selective growth-reduction of the LECs. Figure 6A  
 178 shows a z-projection of a posterior nest surrounded by LECs in which growth was reduced. As compared to the wild type,  
 179 histoblasts are characterized by a larger apical area (Fig. 6D), straighter junctions (Fig. 6F), but a perimeter of similar size as  
 180 the wild type cells (Fig. 6E). Thus, less crowding through the reduction of the growth of LECs reduces junctional buckling of  
 181 histoblasts in a non-autonomous way. This result supports the hypothesis that the laterally pushing LECs are at the origin of  
 182 both the formation of buckled junctions and the reduction of histoblast apical area.

183 In our hypothesis, histoblast buckling is a form of remodeling driven by the concomitant action of the lateral compression  
 184 from LECs and the growth of the histoblast junctions themselves. We thus specifically altered junctional growth in histoblasts  
 185 by genetic means, impairing the activity of Rab11, known for its role in cadherin recycling. In particular, Rab11 is responsible  
 186 for the transportation of newly-synthesized cadherin as well as recycled cadherin and other proteins to the cell junctions<sup>(33)</sup>. We

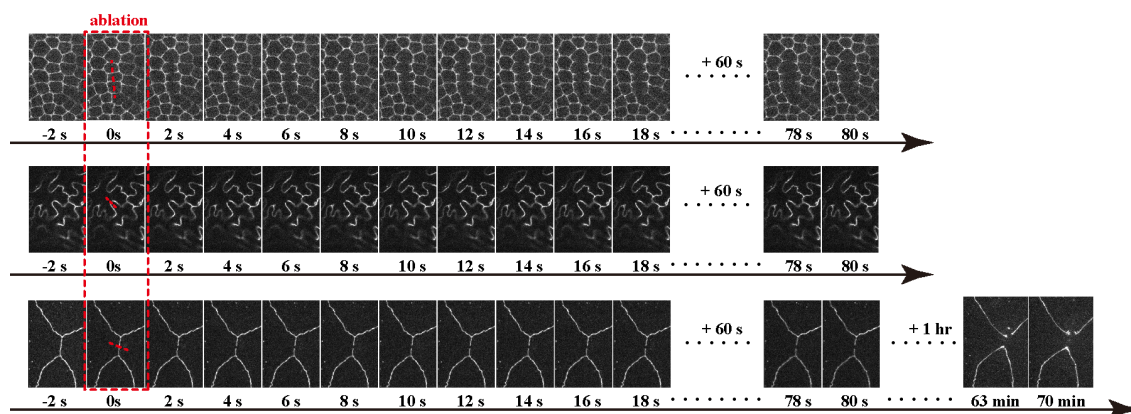

**Figure 5. Laser ablation of larval epithelium.** **A** Laser ablation of pupal epidermis. **B**: Laser ablation of histoblasts in a 95 h AEL larva. **C**: Laser ablation of LECs in a 95 h AEL larva, close to histoblasts.

187 induced the over-expression of a Rab11 dominant negative (Rab11-DN) specifically in the histoblasts. As shown in Fig. 6B, the  
188 effect is that histoblasts have shorter junctions (40 vs 110  $\mu\text{m}$  as in the wild type), smaller apical area (50 vs 150  $\mu\text{m}^2$ ) and do  
189 not undergo junctional buckling.

190 Combined, these perturbation experiments provide strong evidence that junctional buckling of the histoblasts is the result of  
191 a imbalance between the addition of junctional material in the histoblasts and mechanical constraints from the overcrowding of  
192 the epidermis.

### 193 Reintroduction of cell division abolishes junctional folding

194 Unlike imaginal discs, the other precursors of adult tissues in the *Drosophila*, histoblasts do not divide while they grow. As a  
195 consequence, cell-cell interfaces of the histoblasts lengthen in the course of the larval stages (Fig. 1). The length of junctions  
196 may be an important intrinsic factor that control the buckling transition. Indeed the critical compressive load at which buckling  
197 proceeds for an elastic beam scales as  $\sim L^{-2}$ , where  $L$  is the characteristic length of the beam. Besides the alteration of Rab11  
198 function, an alternative way to alter the size distribution of junctions is to reintroduce cell divisions in histoblasts.

199 We forced histoblasts to divide by over-expressing the mitotic controller *cdc25* (string in *Drosophila*)<sup>34</sup>. This perturbation  
200 only impacts the cell cycle and not growth<sup>35</sup>. As a consequence, histoblasts were more numerous in the histoblasts nests (around  
201 100). As shown in Fig. 6C,F, individual histoblasts are consequently smaller and have straight junctions. This experiments  
202 confirms that junctional buckling is a result of the combined overcrowding and absence of divisions.

203 Besides the direct effect on cell junctions, the whole histoblast nest is also larger than in the control Fig. 6C. A possible  
204 interpretation for this experiment is that the shortened length of junctions prevents the onset of buckling and thus improves  
205 their ability to withstand mechanical stress. As the junctions are less prone to buckling, the overall nest becomes stiffer and  
206 gets squeezed to a lesser degree. Thus, forcing cell divisions in histoblasts abolishes buckling and reduces compaction of the  
207 histoblast nest.

### 208 Qualitative model of junctional buckling

209 Based on our results, we formulated a descriptive model that we called the junctional buckling model (Fig. 7). According to  
210 our model, LECs and histoblasts form a continuous cell layer which is initially homogeneously thin (few  $\mu\text{m}$ ), with LECs and  
211 histoblasts sharing similar polygonal morphologies, but different sizes. None of the populations divides, but both grow. At the  
212 end of the larval phase, cellular crowding of the epidermal surface generates a mechanical constraint on the entire histoblast  
213 nest. A loss of junctional myosin changes the mechanical properties of histoblasts' junctions, which become less stiff, but are  
214 still increasing in length. The increased length of histoblast-junction reduced stiffness, and compressive load from cellular  
215 crowding altogether induce buckling of histoblast junctions, with three main consequences on the epithelial morphology: I)  
216 Histoblasts junctions lobulate, II) their apical area squeezes, and III) the cell volume is redistributed below the apical surface.  
217 Such a volume redistribution is necessary to accommodate the increased mass of growing cells, while the apical surface is  
218 reduced.

219 The junctional buckling contrasts with conventional buckling in several ways. First, junctional buckling proceeds at shorter  
220 spatial length than the total length of the junction, the latter being expected when a simple elastic beam experiences compressive  
221 load. High frequency modes are expected when the compressed structure is coupled to an elastic structure. They have been  
222 observed for example on buckled microtubules in contractile cells<sup>36</sup>. Second, the precise shape of histoblast-junctions seem to



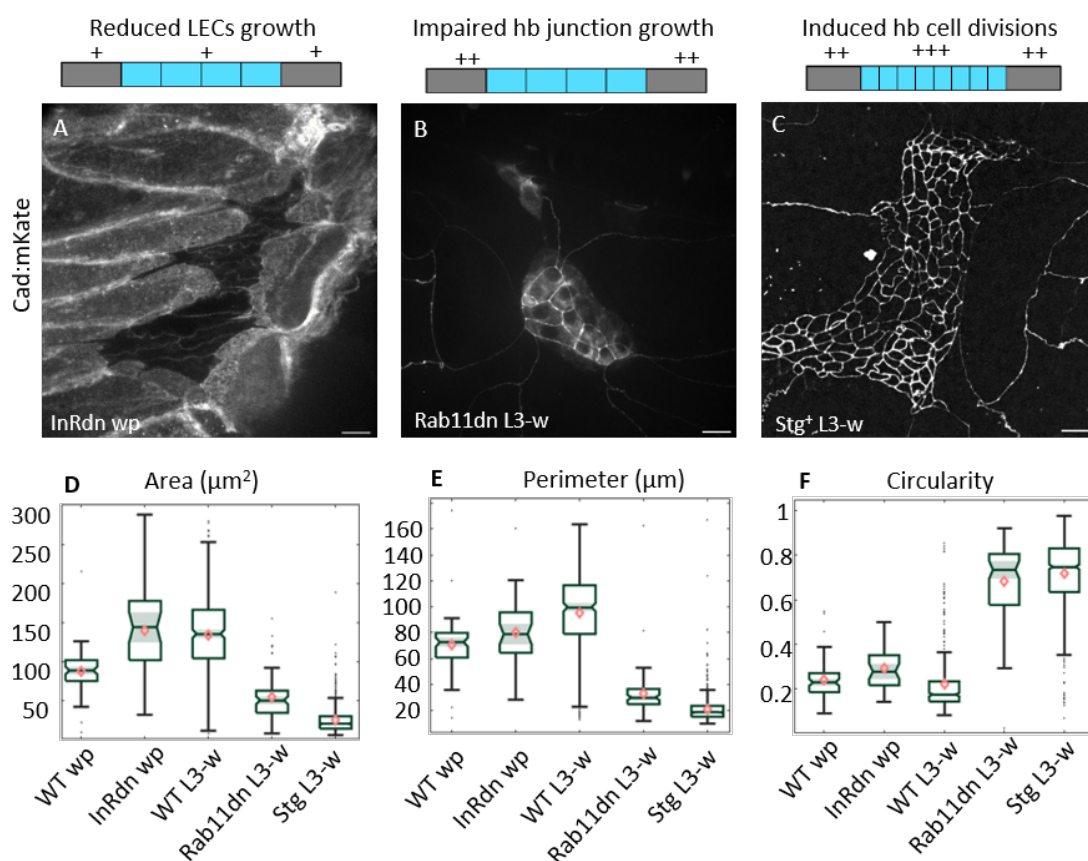

**Figure 6. Genetic perturbation of larval epidermis .** **A:** Drosophila epidermis (end of larval stage here, also called white pre-pupa, wp) when LECs growth was reduced by impairing the insulin receptor pathway (*cad::mkate*; *e22c-Gal4* > *UAS-InRdn* *UAS-GFP*). A cytosolic GFP was co-expressed with *InRdn* to confirm that gene expression is confined to LECs. A reduced junctional buckling is observed in histoblasts. **B:** Live image of a wandering stage larva in which histoblast junction recycling was impaired by a dominant negative form of Rab11 (*cad::mkate*; *esg-Gal4* > *UAS-Rab11dn*). *Rab11dn* histoblasts show shorter, straight junctions and reduced apical area. **C:** Epidermis of a wandering stage larva in which cell divisions in histoblasts was forced by overexpressing *cdc25/stg* (*cad::mkate*; *esg-Gal4* > *UAS-Stg*). Histoblast are more numerous, smaller and buckling is abolished. **D-F:** Quantification of the essential descriptors: cell area (D), perimeter (E), circularity (F). Scale bar = 10  $\mu\text{m}$ . WT = wild type, wp = white pre-pupa, L3-w = wandering stage larva. N cells = 352 (wt), 38 (*InRdn*), 82 (*Rab11dn*), 880 (*Stg+*)

## JUNCTIONAL BUCKLING MODEL

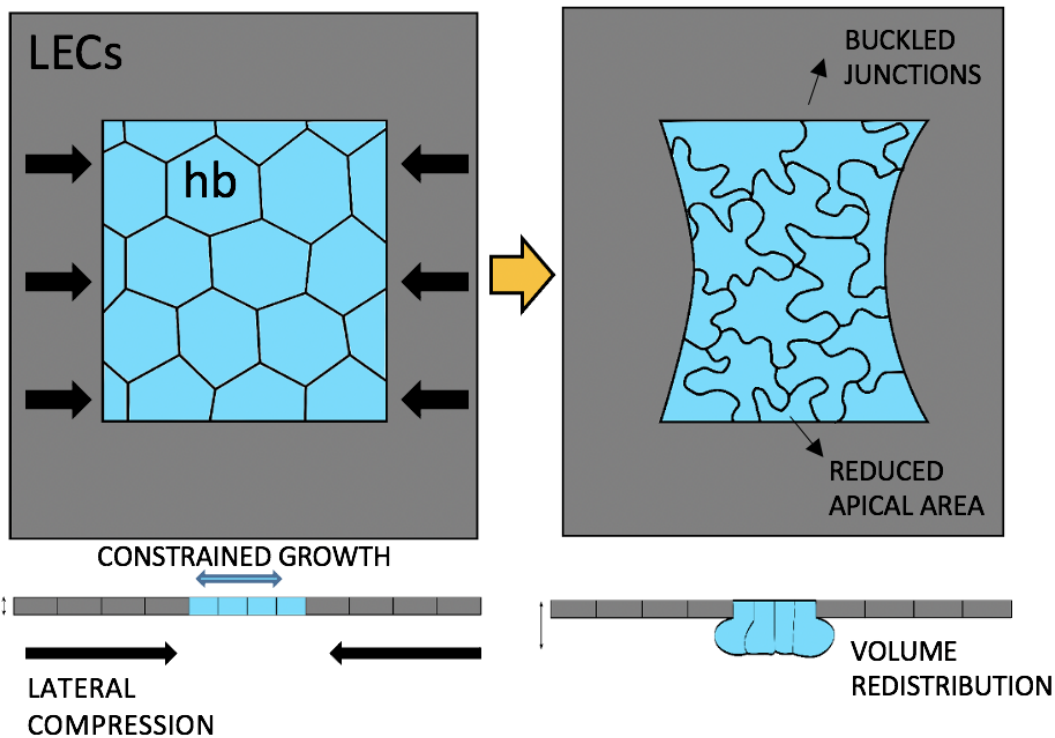

**Figure 7. Junctional buckling model** Qualitative model of histoblasts' morphological transition. Histoblast, in blue, are surrounded by LECs, which grow at a faster rate, hence applying a lateral force to histoblast at the apical plane. While histoblast are also growing, their growth is constrained. This competition for the available space results in three main consequences on the 3D geometrical configuration of the weak population (histoblast): cell junctions buckle under the lateral push, histoblast apical area decreases, and histoblast grow below the apical surface, hence redistributing their cell volume.

223 be stabilized by a plastic process, as evidenced by the fact that rupture of the junctions does not straighten the junction (Fig. 5).

224 In our model, the two histoblast-intrinsic factors that contribute to buckling are the absence of cell divisions in the growing  
225 histoblasts, which makes adherens junctions lengthen continuously, and the softening of the junctions through a loss of  
226 cytoskeletal components. These two factors are poised in a such a way that the apical junctions buckle as crowding increases,  
227 which effectively compacts histoblasts.

## 228 Discussion

229 We have presented a novel case of epithelial morphogenesis in which most of the canonical rules for epithelial development  
230 are no longer valid. In recent years, an emphasis has been put on the importance of junctional tension in shaping epithelial  
231 cells<sup>2,37,38</sup>, and the release of mechanical stress through topological transitions<sup>6,7,39</sup>. Instead, the larval epidermis of *Drosophila*  
232 is formed by two cell populations which are growing but not dividing and not exchanging neighbors. We observe that histoblasts'  
233 junctions evolve into a deeply folded phenotype (Fig. 1), very different from the tensed straight cell interfaces usually found in  
234 epithelia. Such unusual phenotype, which we named junctional buckling, is stable over several hours.

235 We investigated the formation of histoblast junctional folding and found that it is a non-autonomous transition originated by  
236 the competition for space of the two cell populations. We found that buckling correlates with a relocation of the cytoskeletal  
237 proteins actin and myosin II from histoblasts' junctions (Fig. 3, 4). This cytoskeletal depletion of junctions may help their  
238 folding by reducing their stiffness, owing to the fact that the critical buckling load of a beam scales linearly with the stiffness.  
239 Thus folding may proceed at the onset of a buckling instability induced both by an increased lateral compression and a reduced  
240 stiffness of the junctions and greater propensity to bend. To support our idea of a compressive force due to an overcrowding, we  
241 altered the mechanical equilibrium by genetically modifying either growth or cell divisions. Limiting the growth of LECs or  
242 the lengthening of histoblast junctions results in the reduction, and in some cases complete abolition, of junctional buckling  
243 (Fig. 6 A,B). Notably, the non-autonomous effect of reduced growth of LECs on buckling of histoblast junctions is a strong  
244 indicator that junctional buckling of histoblast is not driven exclusively by a cell autonomous program but also results from the  
245 mechanical tug of war between the two populations. Similarly, when we reintroduced cell divisions (Fig. 6C), the number  
246 of junctions was multiplied and histoblasts provided with a resisting force against the pushing LECs. Hence, we found the  
247 typical morphology of straight cell junctions. Because no effect is observed when folded junctions are ablated, we speculate  
248 that a plastic remodeling of junctions takes place that dissipates the stress due to lateral compression. Hence, when tissues are  
249 not under tensions, growth-related stresses lead to stable phenotypes which do not belong to the known phase space of tensed  
250 epithelia<sup>2</sup>.

251 The buckled junctions are reminiscent of fluctuating junctions as observed both in *Drosophila* and in other organisms. For  
252 example, during early dorsal closure, amnioserosa cells show wrinkled cell junctions due to fast contractions of the acto-myosin  
253 cytoskeleton<sup>25,40-42</sup>. A closer look however indicates that these are very different mechanisms : the typical time scale of these  
254 fast contractions is of the order of seconds. Instead, junctional folds in histoblasts gradually fold over a period of hours and last  
255 up to the pupal phase, when cell divisions start. A closer cellular process is at play in the pavement cells of plant leaves<sup>43,44</sup>.  
256 These "puzzle-shaped" cells are very similar to histoblasts in that they also develop over a long time interval and stabilize by a  
257 plastic remodeling<sup>43</sup>. Although the final shape of plant pavement cells closely resembles that of histoblasts, their makeup seems  
258 to operate in reverse. Plants have a rigid cell wall that is under tension from turgor pressure. In the case of the puzzle shape of  
259 pavement cells, the formation of lobes is driven by growth restriction in a field under tension. Instead, the formation of lobes in  
260 histoblasts is due to lateral compression, which we believe is then compensated for by a plastic remodeling. With physical  
261 mechanism operating in reverse, compression vs tension, histoblasts and pavement cells are examples of stable phenotypes that  
262 differ from the usual polygonal shape, and that are governed by other mechanisms than acto-myosin tension.

263 Is there an advantage for histoblasts to go through junctional buckling? We propose that this folding of junctions allows  
264 the entire histoblast nest to remain compact while its constitutive cells are growing in a crowded epidermis. Owing to the  
265 potential effects of compressive forces on cell physiology (reviewed in<sup>45</sup>), this compaction of the nest may serve to avoid the  
266 crowding to reach deleterious levels. The compact, folded state is made possible by the absence of cell divisions (Fig. 6C) and  
267 the softening of the junctional cortex (Fig. 3, 4). Through this mechanism, the delay of cell divisions to the pupal stage (a stage  
268 when the larval epidermis will degrade) may thus serve to protect histoblast by taming the compressive stress. Alternatively,  
269 just keeping the growing nest as small as possible reduces the chance that it will be damaged accidentally in the larval life. It is  
270 interesting to compare the growth of histoblasts with that of imaginal discs, which are the other precursors of adult tissues  
271 in *Drosophila*. Imaginal discs grow as isolated luminal epithelia attached to the larval carcass through only a thin stalk. As  
272 opposed to histoblasts, imaginal cells do divide as they grow<sup>46</sup>. This may be linked to the fact that they do not experience the  
273 overcrowding like histoblasts, as imaginal discs are not contiguous to any other growing tissue.

274  
275 To conclude, crowding of the *Drosophila* larval epidermis compresses growing junctions of histoblasts, giving rise to  
276 changes in shape linked with buckling. Histoblasts are poised in a mechanical regime yet unexplored to our knowledge. In

277 future work, it will be interesting to address how junctional buckling differs from classical buckling of elastic beams – in  
278 particular to understand the nature of the plastic process which stabilizes the folds as they form.

## 279 **Methods and Materials**

### 280 **Fly stocks**

281 *D. melanogaster* strains were grown at 25°C except if else stated, in standard food (Nutri-Fly "German formulation"). A list of  
282 all the strains used for this study and generated for this study is listed in Table 1. For snapshot-imaging of larvae at the same  
283 stage, eggs were collected every 4 hours from the culture tube. The age is thus expressed in hours after egg laying (h AEL), and  
284 the results averaged of a time window of 4 hours.

| Stock description                       | Short name               | Origin       |
|-----------------------------------------|--------------------------|--------------|
| ;endo-Ecad:mKate(2x) / CyoGFP;          | cad:mKate                | Y. Bellaiche |
| ; endo-cad:GFP; hist:RFP                | cad:GFP                  | C. Collinet  |
| ; esg-Gal4 endo-cad:GFP ;               | esg-Gal4 cad:GFP         | this study   |
| ; esg-Gal4 endo-cad:GFP ; Gal80ts /TM6b | esg-Gal4 cad:GFP Gal80ts | this study   |
| esg-Gal4 endo-cad:mKate                 | esg-Gal4 cad:mKate       | this study   |
| ; Eip71CD-Gal4 ;                        | Eip71-Gal4               | Bloom. 6871  |
| ; Eip71CD-Gal4, cad::mKate              | eip71-Gal4 cad:mKate     | this study   |
| ;UAS-Src:GFP;                           | UAS-src:GFP              | P. Kakanj    |
| yw;;UAS-InR(DN)                         | UAS-InR(DN)              | Bloom. 8253  |
| UAS-stg.N/CyO                           | UAS-stg                  | Bloom. 4777  |
| w[*] dlgl1[YC0005]                      | Dlg:GFP                  | Bloom. 59417 |
| sqhAx3; sqh-sqh:GFP; sqh-sqh:GFP        | UAS-Rab11dn              | Bloom. 66675 |
| w;; UAS-Rab5-S43N                       | UAS-Rab5DN               | J. Solon     |
| w[*]; shi[ts]                           | UAS-Shi[ts]              | Bloom.66675  |
| y[1] w[*]; UAS-Rok.CAT                  | UAS-RokCAT               | Bloom.6668   |
| y[1] v[1]; UAS-RokRNAi                  | UAS-RokRNAi              | Bloom. 28797 |
| :: UASp-affimer06:GFP                   | UAS-aff06:GFP            | M. Mavrakis  |

**Table 1.** stocks. Bloom. = Bloomington stock center. Short name = name used in the main text.

### 285 **Live imaging**

286 Live imaging was performed with a custom built confocal spinning disc setup built of an inverted microscope (EclipseTi2-E,  
287 Nikon Instruments), and a spinning disc device (CSU-X1-M1, Yokogawa). Images were acquired with a 488 and a 561 nm  
288 lasers (Sapphire, Coherent) and an iXon Ultra888 EMCCD camera (Andor,Oxford Instruments). Z-stacks were acquired with  
289 a z-interval of 1 . Laser power and exposure were kept as low as possible for chronic imaging, to reduce phototoxicity. The  
290 two color channels (GFP and mCherry, 488 and 564 nm lasers, respectively), where acquired in sequence. All images were  
291 obtained with a 60X water-immersion objective (Plan Apo 60x, NA 1.2, Nikon).

### 292 **Snapshot imaging**

293 We refer to snapshot imaging when each larva was imaged just once, at a specific time. To characterize the buckling  
294 transition, we imaged staged cad:mCherry larvae at different ages (hours AEL). To compare different mutants and obtain other  
295 measurements (i.e. myosin and actin content, cell volume, cell thickness), we chose larvae at the wandering stage, when the  
296 buckling transition has accomplished. Larvae were anesthetized with a custom-built chamber made with a glass-bottom Petri  
297 dish (MakTek), and a 3D-printed lid with two inlets (Fig. S6), connected to two syringes via rubber tubings (VWR, Tygon  
298 3603). One tube can be closed by a two-way manual valve (Masterflex, 30600-00) and the other by a three-way valve  
299 (Masterflex, 30600-01 ). 200  $\mu$ l of Desflurane (Suprane, Baxter) were injected in one syringe, then the syringe closed to 5  $\mu$ l  
300 and the liquid let expand to about 18  $\mu$ l, by closing the valve. In the meanwhile, larvae were washed in PBS and placed in the  
301 Petri dish. After a first anesthetization of about 5 minutes, the valves were closed, and the Petri dish open to allow alignment of  
302 the larvae to image histoblasts. The anesthetic was then reinjected and the larvae imaged immediately after.

### 303 **Chronic imaging**

304 We refer to chronic imaging when the same larvae were imaged several times, at different ages. The anesthetization and imaging  
305 protocol adapted from<sup>47</sup> is schematized in S1. Larvae were washed and anesthetized as described above, but with a lower  
306 anesthetic dose (150  $\mu$ l). To avoid potential effects on growth due to starvation, we limited the anesthetization time (including  
307 imaging) to about 30 minutes. After each imaging session, larvae were put one by one in a humid chamber with soft food and  
308 incubated at 25°C. With this protocol, all analyzed larvae survived to the adult phase.

### 309 **Laser ablation experiments**

310 Laser-ablation experiments were implemented on a home-built system described in Meng *et al.*<sup>48</sup>. The system couples a  
311 near infrared 130 fs mode-locked Ti: sapphire laser (YLMO 930 $\pm$ 10 nm, MenloSystems) operating at 130 MHz to an inverted  
312 Nikon Eclipse Ti microscope (Nikon Instruments) equipped with a Yokogawa spinning disk unit (CSU-X1, Yokogawa Electric)  
313 for performing ablation and recording of sample perturbation after ablation.

### 314 **Laser ablation**

315 Ablation of epithelial junctions were performed by tightly focused the NIR laser in the focal plane using a water-immersion  
316 objective (Plan Apo 60 $\times$ , NA 1.2, Nikon) and realised plasma ablation. To generate line ablations the laser beam was moved 2  
317 to 3 times along target region in the sample with the help of a Galvano scanner (Cambridge Technologies) at a constant speed  
318 of about 500  $\mu$ m<sup>-1</sup> with an average power of 154 mW at the back aperture of the objective.

### 319 **Time-lapse imaging**

320 Acquisition was performed before and after ablation with the help of 488 nm diode laser (2 mW nominal, coherent OBIS  
321 LX) by using the same microscope as ablation. For all ablation experiments, an initial GFP frame was acquired prior to laser  
322 ablation and located the ablation region. For larval epidermal cells (LECs) and histoblasts, time-lapse imaging was acquired at  
323 a frame rate of 5 fps to visualize the ablation process and the changes of ablation region.

### 324 **Image analysis**

325 Image processing and data analysis were mainly performed in Matlab using custom-written scripts. Preprocessing Image  
326 segmentation of cad:mKate and cad:GFP projections were done in Ilastik<sup>49</sup> and TissueAnalyzer for ImageJ.

### 327 **Morphological analysis of histoblasts' junctions**

328 For morphological analysis, z-stacks of cadherin junctions obtained by confocal spinning disk microscopy were projected by  
329 simple maximum projections, when the tissue was well positioned and parallel to the glass slide, or by a curved projection  
330 when the histoblast plane was tilted relatively to the imaging plane. The surface detection algorithm and curved projection  
331 were performed using the procedures described in Abouakil *et al.*<sup>50</sup>. The maximum intensity projections were then segmented  
332 using Ilastik<sup>49</sup> and Tissue analyzer<sup>51</sup>. The segmentations were then used to calculate cell area, perimeter and circularity. We  
333 represented each parameter and group of data as a box plot containing the mean value (diamond-shape marker), median (middle  
334 solid line), lower and upper quartiles (box limits), outliers (dots), and minimum and maximum non-outliers values. The notches  
335 and shaded regions represent the 5% confidence interval, i.e. if two boxplots have superposed notches, the two data set are  
336 considered from the same Gaussian distribution.

### 337 **Myosin and actin content analysis**

338 The surface-detection algorithm by Abouakil *et al.*<sup>50</sup> was used to define the plane of cadherin junctions. The identified surface  
339 was then used as a mask to analyze the fluorescence signal coming from junctional actin or myosin. The junctional enrichment  
340 was then calculated as the ratio of the normalized intensity of the junctions and of the cytosol, at the corresponding plane.

### 341 **Volume estimation**

342 cad:mKate esg>GFP flies were imaged to estimate the total nest volume, as a function of the average cell circularity. We  
343 analyzed Cad:mKate stacks as described in the morphometric analysis section. To obtain an estimate of the volume, we first  
344 equalized the intensity values of all stacks, then used Ilastik to obtain 3D-segmentation of the GFP signal. Finally, we analyzed  
345 and plotted the data with Matlab, MathWorks.

### 346 **Thickness measurements**

347 Histoblast thickness was measured from cad:mKate esg>src:GFP flies. Cad:mKate stacks were analyzed as described above.  
348 Esg>src:GFP stacks were analyzed using a custom script coded in Matlab as follows. For each xy pixel, the z signal was fitted  
349 to a double Gaussian to identify the positions of the intensity peaks, i.e. of the apical and basal membrane at each position. For  
350 each nest we thus calculated the average thickness as the average distance between the two membranes. Data from different  
351 stacks were then pooled to obtain average values as a function of cell circularity.

## Acknowledgments

We thank Manos Mavrikakis, Sophie Brasselet, Raphael Clément, Martine Ben Amar, Richard Smith, Adam Runion for fruitful discussions on this project. We thank Frédéric Galland for advice on image analysis. We thank Yohans Bellaïche, Jérôme Solon, Manos Mavrikakis, Claudio Collinet and Parisa Kakanj for sharing stocks.

This work was funded by the following agencies: Agence Nationale de la Recherche (ANR-18-CE13-028, ANR-17-CE30-0007); Excellence Initiative of Aix-Marseille University - A\*Midex (capostromex), a French Investissements d’Avenir programme; The project leading to this publication has received funding from the « Programme d’Investissements d’Avenir » of the French Government, managed by the French National Research Agency (ANR-16-CONV-0001, ANR21-ESRE-0002), and from Excellence Initiative of Aix-Marseille University - A\*MIDEX.

## References

1. Gibson, M. C., Patel, A. B., Nagpal, R. & Perrimon, N. The emergence of geometric order in proliferating metazoan epithelia. *Nature* **442**, 1038–1041 (2006).
2. Farhadifar, R., Röper, J. C., Aigouy, B., Eaton, S. & Jülicher, F. The Influence of Cell Mechanics, Cell-Cell Interactions, and Proliferation on Epithelial Packing. *Curr. Biol.* **17**, 2095–2104, [10.1016/j.cub.2007.11.049](https://doi.org/10.1016/j.cub.2007.11.049) (2007).
3. Lim, C. T., Zhou, E. H. & Quek, S. T. Mechanical models for living cells—a review. *J. biomechanics* **39**, 195–216, [10.1016/j.jbiomech.2004.12.008](https://doi.org/10.1016/j.jbiomech.2004.12.008) (2006).
4. Cai, Y. & Sheetz, M. P. Force propagation across cells: mechanical coherence of dynamic cytoskeletons. *Curr. opinion cell biology* **21**, 47–50, [10.1016/j.ceb.2009.01.020](https://doi.org/10.1016/j.ceb.2009.01.020) (2009).
5. Heisenberg, C. P. & Bellaïche, Y. XForces in tissue morphogenesis and patterning. *Cell* **153**, 948, [10.1016/j.cell.2013.05.008](https://doi.org/10.1016/j.cell.2013.05.008) (2013).
6. LeGoff, L. & Lecuit, T. Mechanical forces and growth in animal tissues. *Cold Spring Harb. Perspectives Biol.* **8**, 1–18, [10.1101/cshperspect.a019232](https://doi.org/10.1101/cshperspect.a019232) (2016).
7. Baum, B. & Georgiou, M. Dynamics of adherens junctions in epithelial establishment, maintenance, and remodeling. *J. Cell Biol.* **192**, 907–917, [10.1083/jcb.201009141](https://doi.org/10.1083/jcb.201009141) (2011).
8. Takeichi, M. Dynamic contacts: Rearranging adherens junctions to drive epithelial remodelling. *Nat. Rev. Mol. Cell Biol.* **15**, 397–410, [10.1038/nrm3802](https://doi.org/10.1038/nrm3802) (2014).
9. Foolen, J., Yamashita, T. & Kollmannsberger, P. Shaping tissues by balancing active forces and geometric constraints. *Curr. Opin. Cell Biol.* **49**, 053001, [10.1088/0022-3727/49/5/053001](https://doi.org/10.1088/0022-3727/49/5/053001) (2015).
10. Ambrosi, D. *et al.* Growth and remodelling of living tissues: perspectives, challenges and opportunities. *J. The Royal Soc. Interface* **16**, 20190233, [10.1098/rsif.2019.0233](https://doi.org/10.1098/rsif.2019.0233) (2019).
11. Lee, T., Holland, M. A., Weickenmeier, J., Gosain, A. K. & Tepole, A. B. The geometry of incompatibility in growing soft tissues: Theory and numerical characterization. *J. Mech. Phys. Solids* **146**, 104177, [10.1016/j.jmps.2020.104177](https://doi.org/10.1016/j.jmps.2020.104177) (2021).
12. van Leen, E. V., di Pietro, F. & Bellaïche, Y. Oriented cell divisions in epithelia: from force generation to force anisotropy by tension, shape and vertices. *Curr. Opin. Cell Biol.* **62**, 9–16, [10.1016/j.ceb.2019.07.013](https://doi.org/10.1016/j.ceb.2019.07.013) (2020).
13. Alt, S., Ganguly, P. & Salbreux, G. Vertex models: From cell mechanics to tissue morphogenesis. *Philos. Transactions Royal Soc. B: Biol. Sci.* **372**, [10.1098/rstb.2015.0520](https://doi.org/10.1098/rstb.2015.0520) (2017).
14. Fletcher, A. G., Cooper, F. & Baker, R. E. Mechanocellular models of epithelial morphogenesis. *Philos. Transactions Royal Soc. B: Biol. Sci.* **372**, 20150519 (2017).
15. Gibson, W. T. & Gibson, M. C. Cell topology, geometry, and morphogenesis in proliferating epithelia. *Curr. topics developmental biology* **89**, 87–114 (2009).
16. Holmes, D. P. Elasticity and stability of shape-shifting structures. *Curr. opinion colloid & interface science* **40**, 118–137 (2019).
17. Shyer, A. E. *et al.* Villification: how the gut gets its villi. *Science* **342**, 212–218 (2013).
18. Garcia, K., Kroenke, C. & Bayly, P. Mechanics of cortical folding: stress, growth and stability. *Philos. Transactions Royal Soc. B: Biol. Sci.* **373**, 20170321 (2018).
19. Mandaravally Madhavan, M. & Schneiderman, H. A. Histological analysis of the dynamics of growth of imaginal discs and histoblast nests during the larval development of *Drosophila melanogaster*. *Wilhelm Roux’s Arch. Dev. Biol.* **183**, 269–305, [10.1007/BF00848459](https://doi.org/10.1007/BF00848459) (1977).

- 400 **20.** Lawrence, P. A., Green, S. M. & Johnston, P. Compartmentalization and growth of the *Drosophila* abdomen. *J. Embryol.*  
401 *Exp. Morphol.* **Vol. 43**, 233–245, [10.1242/dev.43.1.233](https://doi.org/10.1242/dev.43.1.233) (1978).
- 402 **21.** Bakker, K. Feeding period, growth, and pupation in larvae of *drosophila melanogaster*. *Entomol. Exp. et Appl.* **2**, 171–186  
403 (1994).
- 404 **22.** Harris, T. J. & Tepass, U. Adherens junctions: from molecules to morphogenesis. *Nat. reviews Mol. cell biology* **11**,  
405 502–514 (2010).
- 406 **23.** Brüser, L. & Bogdan, S. Adherens junctions on the move—membrane trafficking of e-cadherin. *Cold Spring Harb.*  
407 *perspectives biology* **9**, a029140 (2017).
- 408 **24.** Ninov, N. & Martín-Blanco, E. Changing gears in the cell cycle: histoblasts and beyond. *Fly* **3**, 286–289, [10.4161/fly.10443](https://doi.org/10.4161/fly.10443)  
409 (2009).
- 410 **25.** Sumi, A. *et al.* Adherens junction length during tissue contraction is controlled by the mechanosensitive activity of  
411 actomyosin and junctional recycling. *Dev. cell* **47**, 453–463 (2018).
- 412 **26.** Kakanj, P. *et al.* Insulin and TOR signal in parallel through FOXO and S6K to promote epithelial wound healing. *Nat.*  
413 *Commun.* **7**, [10.1038/ncomms12972](https://doi.org/10.1038/ncomms12972) (2016).
- 414 **27.** Yonemura, S. Cadherin–actin interactions at adherens junctions. *Curr. opinion cell biology* **23**, 515–522 (2011).
- 415 **28.** Lopata, A. *et al.* Affimer proteins for f-actin: novel affinity reagents that label f-actin in live and fixed cells. *Sci. reports* **8**,  
416 1–15 (2018).
- 417 **29.** LeGoff, L., Rouault, H. & Lecuit, T. A global pattern of mechanical stress polarizes cell divisions and cell shape in the  
418 growing *drosophila* wing disc. *Development* **140**, 4051–4059 (2013).
- 419 **30.** Mao, Y. *et al.* Differential proliferation rates generate patterns of mechanical tension that orient tissue growth. *EMBO J.*  
420 **32**, 2790–2803, [10.1038/emboj.2013.197](https://doi.org/10.1038/emboj.2013.197) (2013).
- 421 **31.** Rauskolb, C., Sun, S., Sun, G., Pan, Y. & Irvine, K. D. Cytoskeletal tension inhibits hippo signaling through an ajuba-warts  
422 complex. *Cell* **158**, 143–156 (2014).
- 423 **32.** Biglou, S. G., Bendena, W. G. & Chin-Sang, I. An overview of the insulin signaling pathway in model organisms *drosophila*  
424 *melanogaster* and *caenorhabditis elegans*. *Peptides* **145**, 170640 (2021).
- 425 **33.** Woichansky, I., Beretta, C. A., Berns, N. & Riechmann, V. Three mechanisms control e-cadherin localization to the zonula  
426 adherens. *Nat. communications* **7**, 1–11 (2016).
- 427 **34.** Edgar, B. A., Sprenger, F., Duronio, R. J., Leopold, P. & O’Farrell, P. H. Distinct molecular mechanisms regulate cell cycle  
428 timing at successive stages of *drosophila* embryogenesis. *Genes & development* **8**, 440–452 (1994).
- 429 **35.** Neufeld, T. P. & Edgar, B. A. Connections between growth and the cell cycle. *Curr. Opin. Cell Biol.* **10**, 784–790,  
430 [10.1016/S0955-0674\(98\)80122-1](https://doi.org/10.1016/S0955-0674(98)80122-1) (1998).
- 431 **36.** Brangwynne, C. P. *et al.* Microtubules can bear enhanced compressive loads in living cells because of lateral reinforcement.  
432 *The J. cell biology* **173**, 733–741 (2006).
- 433 **37.** Podewitz, N., Delarue, M. & Elgeti, J. Tissue homeostasis: A tensile state. *Epl* **109**, [10.1209/0295-5075/109/58005](https://doi.org/10.1209/0295-5075/109/58005) (2015).
- 434 **38.** Priya, R. *et al.* Feedback regulation through myosin II confers robustness on RhoA signalling at E-cadherin junctions. *Nat.*  
435 *Cell Biol.* **17**, 1282–1293, [10.1038/ncb3239](https://doi.org/10.1038/ncb3239) (2015).
- 436 **39.** Bischoff, M. & Cseresnyés, Z. Cell rearrangements, cell divisions and cell death in a migrating epithelial sheet in the  
437 abdomen of *Drosophila*. *Development* **136**, 2403–2411, [10.1242/dev.035410](https://doi.org/10.1242/dev.035410) (2009).
- 438 **40.** David, D. J., Tishkina, A. & Harris, T. J. The PAR complex regulates pulsed actomyosin contractions during amnioserosa  
439 apical constriction in *Drosophila*. *Development* **137**, 1645–1655, [10.1242/dev.044107](https://doi.org/10.1242/dev.044107) (2010).
- 440 **41.** Jayasinghe, A. K., Crews, S. M., Mashburn, D. N. & Hutson, M. S. Apical oscillations in amnioserosa cells: Basolateral  
441 coupling and mechanical autonomy. *Biophys. J.* **105**, 255–265, [10.1016/j.bpj.2013.05.027](https://doi.org/10.1016/j.bpj.2013.05.027) (2013).
- 442 **42.** Sawyer, J. M. *et al.* Apical constriction: a cell shape change that can drive morphogenesis. *Dev. biology* **341**, 5–19 (2010).
- 443 **43.** Sapala, A. *et al.* Why plants make puzzle cells, and how their shape emerges. *Elife* **7**, e32794 (2018).
- 444 **44.** Carter, R., Sánchez-Corrales, Y. E., Hartley, M., Grieneisen, V. A. & Marée, A. F. Pavement cells and the topology puzzle.  
445 *Development* **144**, 4386–4397 (2017).
- 446 **45.** Valon, L. & Levayer, R. Dying under pressure: cellular characterisation and in vivo functions of cell death induced by  
447 compaction. *Biol. Cell* **111**, 51–66 (2019).

- 448 **46.** García-Bellido, A. & Merriam, J. R. Parameters of the wing imaginal disc development of *Drosophila melanogaster*. *Dev.*  
449 *biology* **24**, 61–87 (1971).
- 450 **47.** Heemskerk, I., Lecuit, T. & LeGoff, L. Dynamic clonal analysis based on chronic in vivo imaging allows multiscale  
451 quantification of growth in the *Drosophila* wing disc. *Development* **141**, 2339–2348 (2014).
- 452 **48.** Meng, H., Nuzhdin, D., Sison, M., Frédéric & LeGoff, L. Adaptive scans allow targeted cell-ablations on curved cell  
453 sheets. *BioRxiv* <https://doi.org/10.1101/2022.01.30.478374> (2022).
- 454 **49.** Berg, S. *et al.* ilastik: interactive machine learning for (bio)image analysis. *Nat. Methods* [10.1038/s41592-019-0582-9](https://doi.org/10.1038/s41592-019-0582-9)  
455 (2019).
- 456 **50.** Abouakil, F. *et al.* An adaptive microscope for the imaging of biological surfaces. *Light. Sci. & Appl.* **10**, 1–12 (2021).
- 457 **51.** Aigouy, B., Umetsu, D. & Eaton, S. Segmentation and quantitative analysis of epithelial tissues. *Drosophila* 227–239  
458 (2016).



459 **Supplementary material**

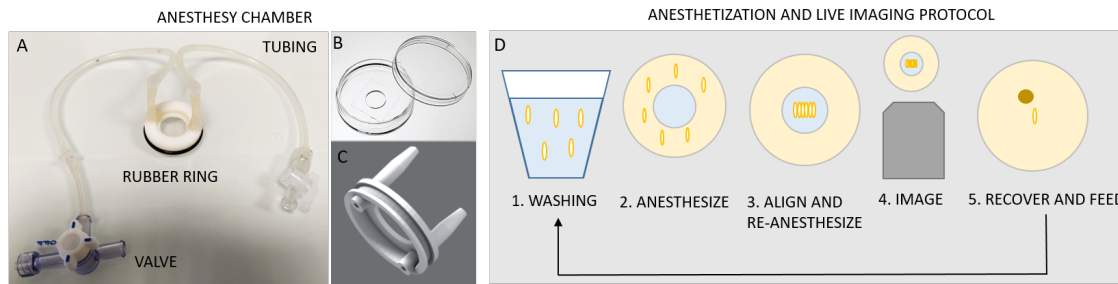

**Figure S1. Anesthesia chamber and imaging protocol** **A:** Assembled anesthesia chamber made of a glass-bottom dish (zoom in **B**), a custom-designed injection lid (zoom in **C**), tubing and valves to which syringes are then connected. **D:** Main steps of the imaging protocol: 1) larvae are washed in PBS and dried on a lab wipe 2) Larvae are positioned around the glass of the Petri dish and anesthetized for 5 min; 3) After closing the valves to keep the anesthetic, larvae are aligned on the glass, with a drop of halocarbon oil; 4) Larvae are imaged by confocal spinning disc microscopy; 5) For chronic imaging, each larva is placed in a petri dish with soft food and let recover for a few hours before starting the procedure at 1.

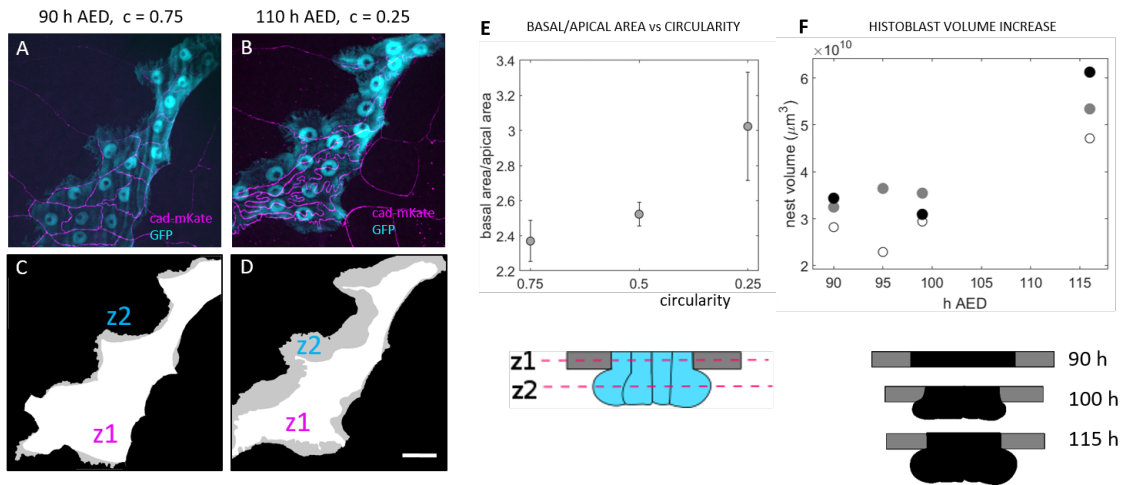

**Figure S2. 3D Characterization of histoblast growth** A - Z-projection of cad:mKate (magenta) and cytosolic GFP (cyan) taken in a larva at 90 h AEL, i.e. at the beginning of the buckling transition. B Z-projections of the same larva 20 hours later, after the formation of junctional folds. C,D Masks of the external contour of the apical and basal sides of the larva in A. The white area is obtained from the apical plane obtained from cad:mKate (z1 in the schematic representation), the gray area from the cytosolic GFP maximum projections. It corresponds to the basal plane at which the nest is the largest (z2 in the schematic representations). Before the transition (C) z1 and z2 are almost superposed, while after transition (D) z2 is much bigger than z1, meaning that HBs expand basally. E Ratio of basal/apical area for different circularity values, obtained from . As HBs junctions fold, the basal areal becomes larger than the apical. Apical and basal areas correspond to the the adherens region and the largest basal area, as schmetized below the plot. F Total nest volume at different times. White, gray and black dots correspond each to one histoblasts nest. As apical surface shrink, histoblasts expand below the adherens region, as schematized below the plot.

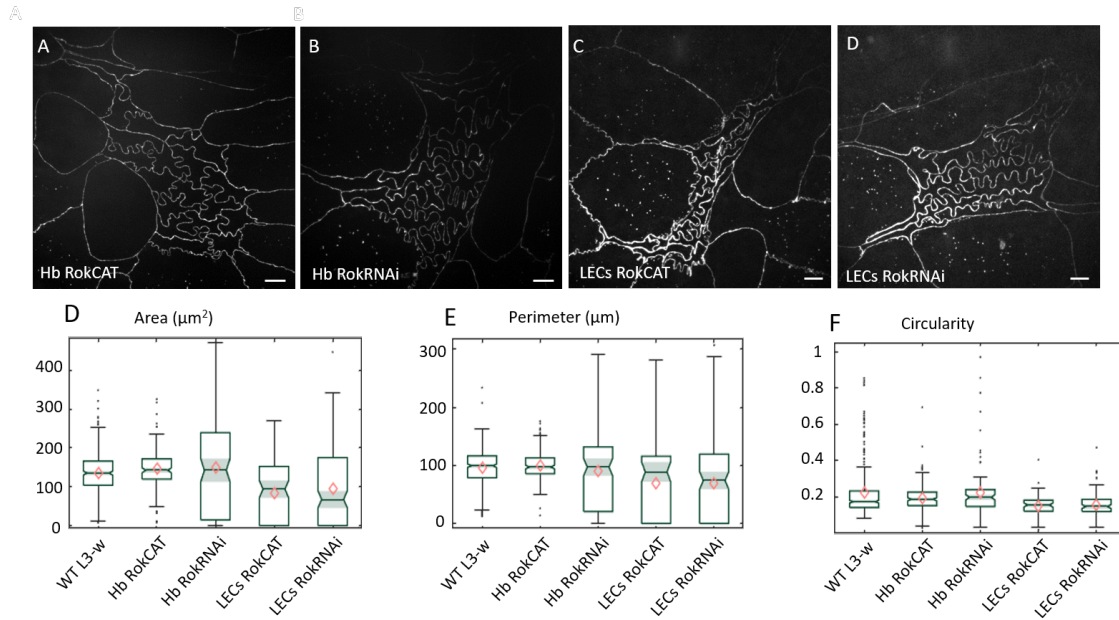

**Figure S3. Genetic perturbation of cell contractility** All images were taken from living larvae at the wondering stage. A: *Hb RokCAT* = mutant histoblasts in a constitutively active form of Rok was expressed. B: *Hb RokRNAi* = mutant histoblasts in which an RNAi against Rok was expressed. C: *LECs RokCAT* = mutant flies in which a constitutively active form of Rok was expressed in LECs. D: *LECs RokRNAi* = mutant LECs in which an RNAi against Rok was expressed. E-H Boxplots of cell area, perimeter and circularity for the different cases illustrated above. WT = wilde type. N = 352, 176, 138, 115, 158 cells for each data set, ordered as in the figure.

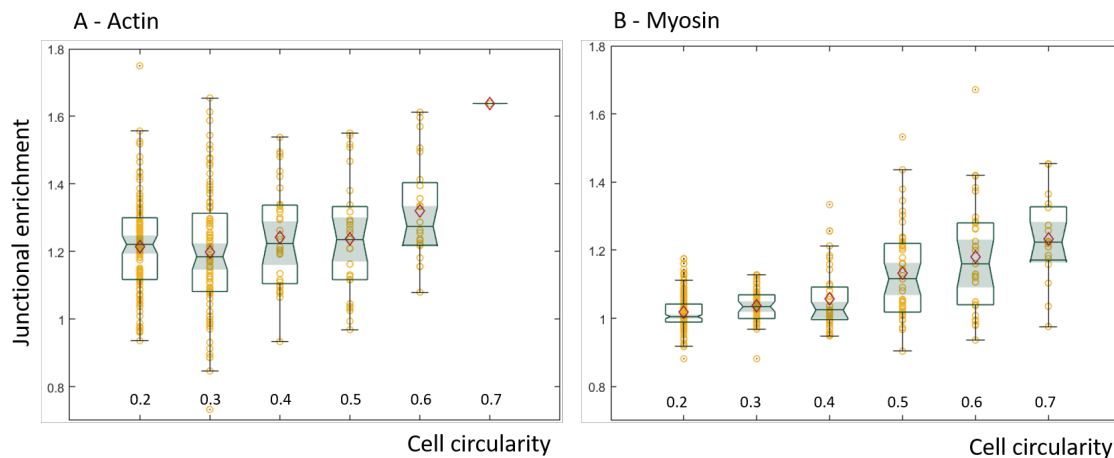

**Figure S4. Junctional enrichment of actin and myosin** Plot of relative amount of junctional actin (A) and myosin (B) as a function of circularity, calculated as the ratio junctional signal/cytoplasmic signal at the same plane. The data were binned with the same bin size for both actin and myosin. The horizontal bar represents the median for each bin, the shadowed areas the confidence interval of 0.05, the diamonds correspond to the mean value for each bin and the yellow circles are single data points. Pearson's correlation coefficients calculated on all the data were 0.18 with a p-value of 0.002 for actin, and of 0.59 with p-value  $1^{-32}$  for myosin data. T-test comparisons for the junctional enrichment of the first and last point gave p-values of 0.002 and  $1.39 \times 10^{-33}$ , for actin and myosin respectively. For each bin, N = 116, 88, 32, 27, 24, 1 (actin) and N = 199, 50, 39, 45, 29, 17

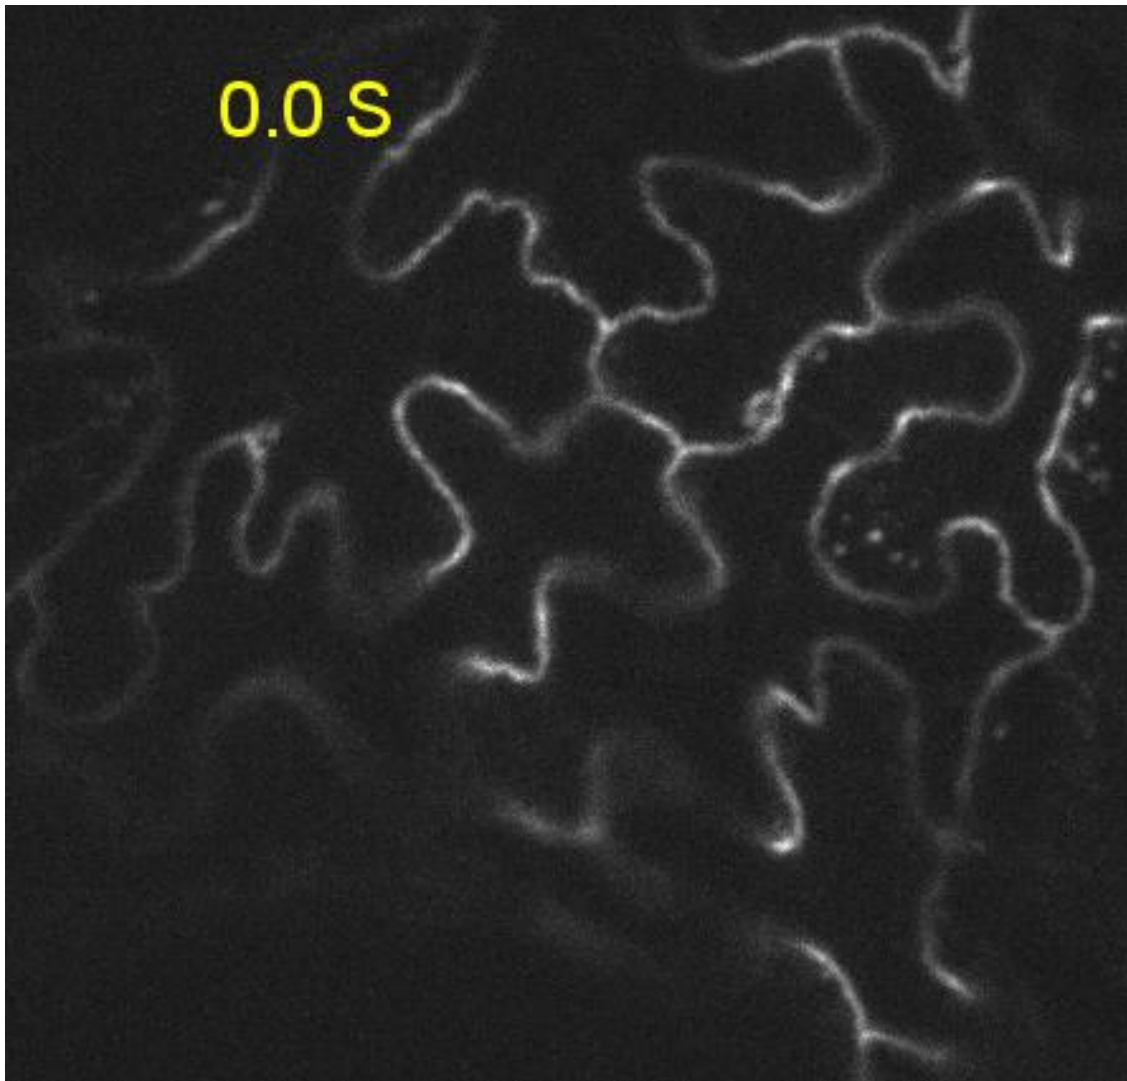

**Figure S5. Movie S1 - Laser ablation of folded histoblasts**

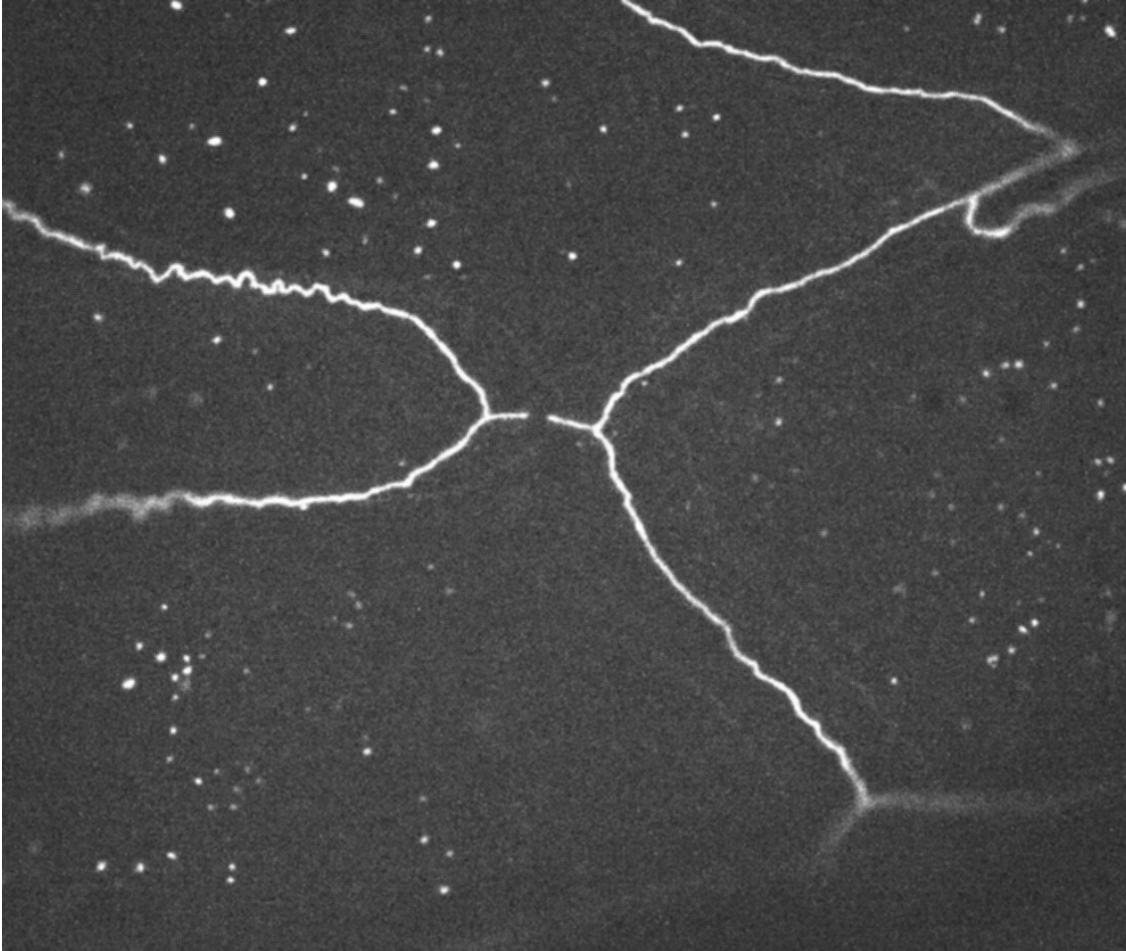

**Figure S6. Movie S2 - Laser ablation of LECs close to histoblasts**
